# Supplementary material for: Reduced Expression of CLEC4G in Neurons Is Associated with Alzheimer’s Disease
Source: MDPI journal article supplement (doi:10.3390/ijms25094621), 2024-04-24
Supplement: s1 [file s1]

## Supplementary Materials

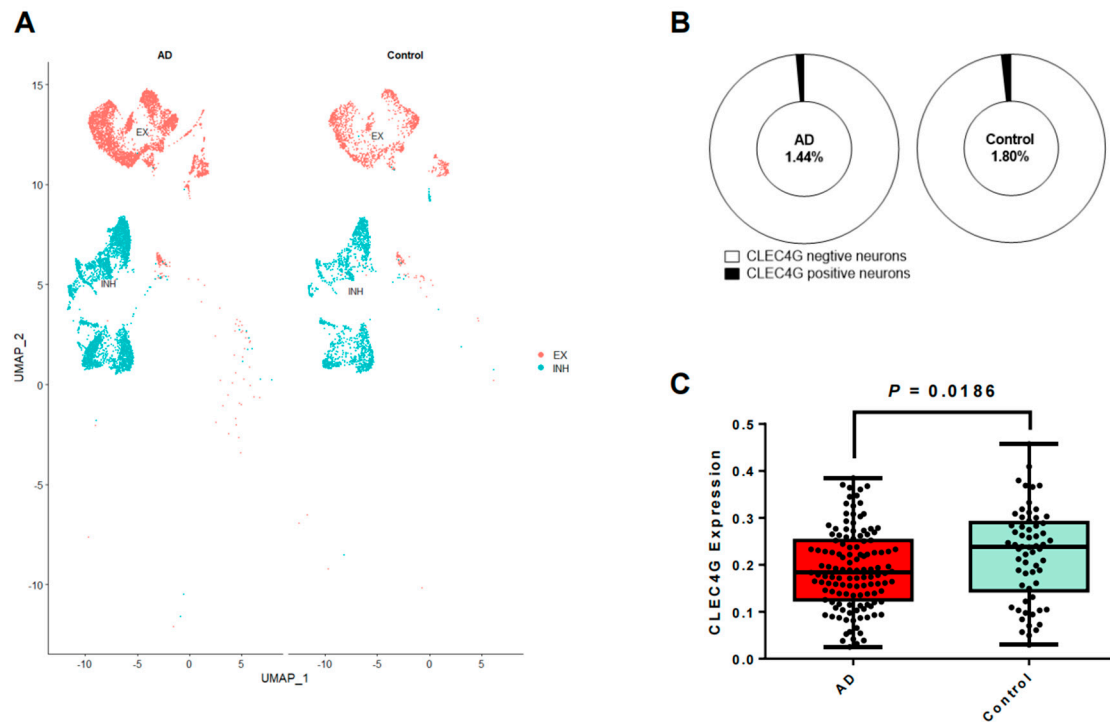

**Figure S1. Analysis of CLEC4G expression in neuronal cell single-cell data.** (A) UMAP visualization of excitatory neurons (EX) and inhibitory neurons (INH) in AD and control groups. (B) CLEC4G expression ratio in neurons of the AD and control groups. (scRNA-seq data source: GSE174367) (C) CLEC4G expression level in the AD and control groups.

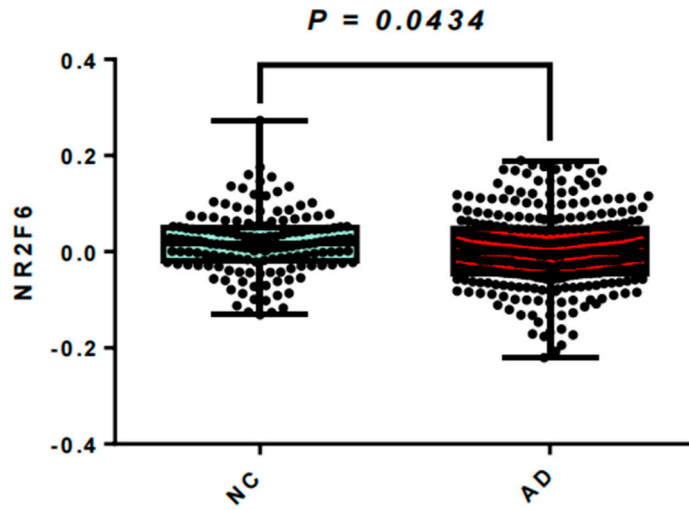

**Figure S2. Comparison of NR2F6 Expression Levels between Normal (NC) and Alzheimer's Disease (AD) Groups.** Data resource: GSE33000 Dataset from GEO database.

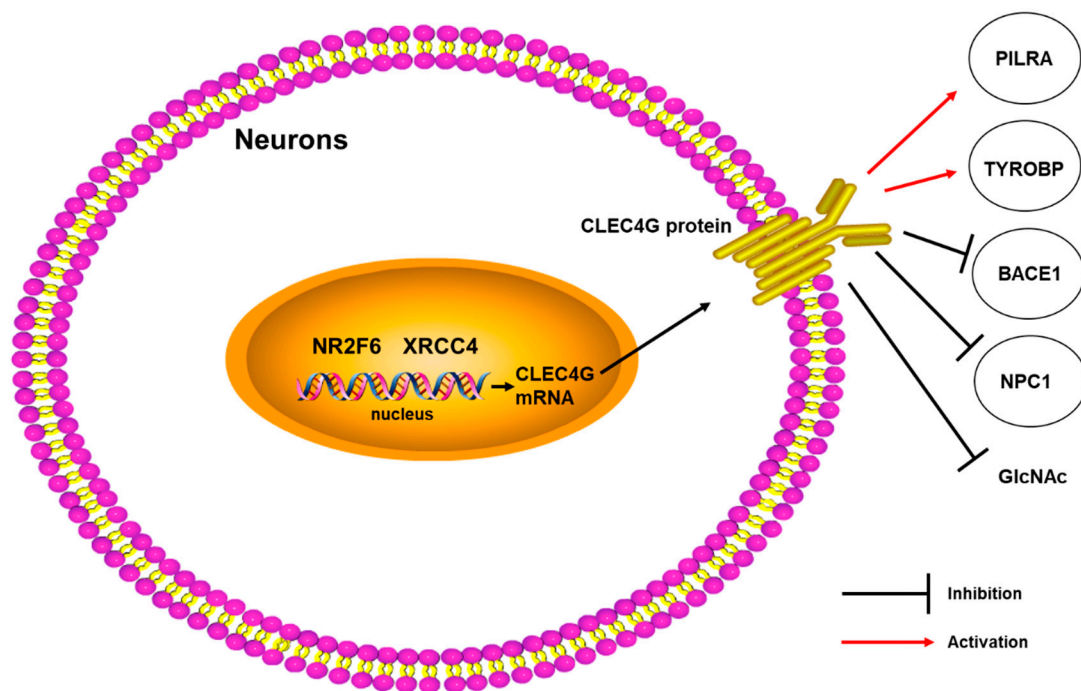

**Figure S3. Schematic figure of hypothetical regulatory pathway of CLEC4G in neurons.**

**Table S1. Details of GEO series included in this analysis**

| GEO series | Contributor, Year       | Alzheimer's disease | Non-demented   | Platform                                           |
|------------|-------------------------|---------------------|----------------|----------------------------------------------------|
| GSE33000   | Narayanan M et al, 2014 | 310                 | 157            | Rosetta/Merck Human 44k 1.1 microarray             |
| GSE39420   | Antonell A et al, 2015  | 14                  | 7              | [HuGene-1_1-st] Affymetrix Human Gene 1.1 ST Array |
| GSE174367  | Morabito S et al, 2021  | 38676 (nuclei)      | 22796 (nuclei) | Illumina NovaSeq 6000                              |

**Table S2. Detailed culture medium formulation**

| Medium | Components | Manufacturer     | Concentration |
|--------|------------|------------------|---------------|
| NIM1   | DMEM/F12   | Gibco            | 50%           |
|        | Neurobasal | Gibco            | 50%           |
|        | N2         | STEMCELL         | 1X            |
|        | B27        | STEMCELL         | 1X            |
|        | hLIF       | PEPROTech        | 10 ng/ml      |
|        | SB431542   | Med Chem Express | 2 $\mu$ M     |
|        | CHIR99021  | Med Chem Express | 3 $\mu$ M     |
|        | Compound E | Med Chem Express | 0.1 $\mu$ M   |

|      |            |                  |             |
|------|------------|------------------|-------------|
| NIM2 | DMEM/F12   | Gibco            | 50%         |
|      | Neurobasal | Gibco            | 50%         |
|      | N2         | STEMCELL         | 1X          |
|      | B27        | STEMCELL         | 1X          |
|      | hLIF       | PEPROTech        | 10 ng/ml    |
|      | SB431542   | Med Chem Express | 4 $\mu$ M   |
|      | CHIR99021  | Med Chem Express | 3 $\mu$ M   |
|      | Compound E | Med Chem Express | 0.1 $\mu$ M |
| NSMM | DMEM/F12   | Gibco            | 50%         |
|      | Neurobasal | Gibco            | 50%         |
|      | N2         | STEMCELL         | 1X          |
|      | B27        | STEMCELL         | 1X          |
|      | hLIF       | PEPROTech        | 10 ng/ml    |
|      | SB431542   | Med Chem Express | 2 $\mu$ M   |
|      | CHIR99021  | Med Chem Express | 3 $\mu$ M   |
| DM   | DMEM/F12   | Gibco            |             |
|      | N2         | STEMCELL         | 1X          |

---

|               |           |             |
|---------------|-----------|-------------|
| B27           | STEMCELL  | 1X          |
| dbcAMP        | Sigma     | 400 $\mu$ M |
| ascorbic acid | Sigma     | 200 $\mu$ M |
| BDNF          | PEPROTech | 10 ng/ml    |
| NGF           | PEPROTech | 10 ng/ml    |

---
